# Supplementary material for: A hybrid framework for improving uncertainty quantification in deep learning-based QSAR regression modeling
Source: Springer Nature journal article supplement (doi:10.1186/s13321-021-00551-x), 2021-09-20
Supplement: 13321_2021_551_MOESM1_ESM.pdf [file 13321_2021_551_MOESM1_ESM.pdf]

## Additional file 1

# A Hybrid Framework for Improving Uncertainty Quantification in Deep Learning-Based QSAR Regression Modeling

Dingyan Wang,<sup>a,b,c,‡</sup> Jie Yu,<sup>b,c,‡</sup> Lifan Chen,<sup>b,c</sup> Xutong Li,<sup>b,c</sup> Hualiang Jiang,<sup>b,c</sup>  
Kaixian Chen,<sup>b,c</sup> Mingyue Zheng,<sup>b,c,\*</sup> Xiaomin Luo<sup>a,b,c,\*</sup>

<sup>a</sup> Shanghai Key Laboratory of Forensic Medicine, Academy of Forensic Science,  
Shanghai 200063, China.

<sup>b</sup> University of Chinese Academy of Sciences, No.19A Yuquan Road, Beijing 100049,  
China.

<sup>c</sup> Drug Discovery and Design Center, State Key Laboratory of Drug Research, Shanghai  
Institute of Materia Medica, Chinese Academy of Sciences, 555 Zuchongzhi Road,  
Shanghai 201203, China.

**Table S1. 5-fold CV SCCs of different models on each dataset in the IVIT setting**

| Targets              | MVE   | ENS   | BYS   | FDIST  | LDIST | Unweighted_Rank | Weighted_Rank | NLLCAL |
|----------------------|-------|-------|-------|--------|-------|-----------------|---------------|--------|
| A2a                  | 0.098 | 0.094 | 0.118 | 0.097  | 0.248 | 0.189           | 0.157         | 0.198  |
| ABL1                 | 0.096 | 0.131 | 0.134 | 0.115  | 0.139 | 0.178           | 0.129         | 0.169  |
| Acetylcholinesterase | 0.219 | 0.350 | 0.326 | 0.177  | 0.317 | 0.382           | 0.380         | 0.366  |
| Aurora-A             | 0.205 | 0.253 | 0.256 | 0.148  | 0.253 | 0.298           | 0.294         | 0.289  |
| B-raf                | 0.112 | 0.266 | 0.218 | 0.190  | 0.282 | 0.299           | 0.311         | 0.315  |
| Cannabinoid          | 0.177 | 0.232 | 0.243 | 0.183  | 0.253 | 0.291           | 0.293         | 0.295  |
| Carbonic             | 0.333 | 0.282 | 0.376 | 0.182  | 0.382 | 0.387           | 0.391         | 0.403  |
| Caspase              | 0.345 | 0.325 | 0.363 | -0.052 | 0.358 | 0.391           | 0.392         | 0.378  |
| Coagulation          | 0.188 | 0.228 | 0.231 | 0.235  | 0.270 | 0.299           | 0.296         | 0.301  |
| COX-1                | 0.368 | 0.352 | 0.382 | 0.273  | 0.362 | 0.434           | 0.429         | 0.428  |
| COX-2                | 0.296 | 0.286 | 0.321 | 0.146  | 0.339 | 0.352           | 0.354         | 0.359  |
| Dihydrofolate        | 0.169 | 0.217 | 0.202 | 0.220  | 0.261 | 0.293           | 0.299         | 0.312  |
| Dopamine             | 0.215 | 0.278 | 0.271 | 0.219  | 0.308 | 0.348           | 0.350         | 0.342  |
| Ephrin               | 0.160 | 0.217 | 0.221 | 0.193  | 0.255 | 0.278           | 0.280         | 0.269  |
| erbB1                | 0.259 | 0.272 | 0.299 | 0.116  | 0.285 | 0.316           | 0.318         | 0.317  |
| Estrogen             | 0.286 | 0.266 | 0.315 | 0.033  | 0.275 | 0.330           | 0.337         | 0.333  |
| Glucocorticoid       | 0.125 | 0.225 | 0.188 | 0.184  | 0.268 | 0.277           | 0.276         | 0.262  |
| Glycogen             | 0.274 | 0.326 | 0.330 | 0.161  | 0.293 | 0.355           | 0.349         | 0.335  |
| HERG                 | 0.217 | 0.287 | 0.280 | 0.162  | 0.285 | 0.316           | 0.310         | 0.318  |
| JAK2                 | 0.218 | 0.270 | 0.278 | 0.157  | 0.284 | 0.308           | 0.310         | 0.294  |
| LCK                  | 0.189 | 0.233 | 0.239 | 0.237  | 0.256 | 0.309           | 0.309         | 0.304  |
| Monoamine            | 0.240 | 0.310 | 0.299 | 0.169  | 0.310 | 0.359           | 0.357         | 0.347  |
| opioid               | 0.188 | 0.286 | 0.255 | 0.154  | 0.275 | 0.318           | 0.316         | 0.240  |
| Vanilloid            | 0.119 | 0.179 | 0.164 | 0.158  | 0.191 | 0.220           | 0.238         | 0.209  |
| Mean                 | 0.212 | 0.257 | 0.263 | 0.161  | 0.281 | 0.314           | 0.312         | 0.308  |

**Table S2. 5-fold CV SCCs of different models on each dataset in the IVOT setting**

| Targets              | MVE   | ENS   | BYS   | FDIST  | LDIST | Unweighted_Rank | Weighted_Rank | NLLCAL |
|----------------------|-------|-------|-------|--------|-------|-----------------|---------------|--------|
| A2a                  | 0.244 | 0.313 | 0.258 | 0.125  | 0.306 | 0.362           | 0.252         | 0.206  |
| ABL1                 | 0.008 | 0.066 | 0.052 | 0.162  | 0.105 | 0.135           | 0.141         | 0.137  |
| Acetylcholinesterase | 0.186 | 0.269 | 0.263 | 0.204  | 0.208 | 0.295           | 0.291         | 0.291  |
| Aurora-A             | 0.099 | 0.104 | 0.107 | 0.195  | 0.121 | 0.192           | 0.178         | 0.174  |
| B-raf                | 0.031 | 0.065 | 0.080 | 0.209  | 0.110 | 0.152           | 0.137         | 0.140  |
| Cannabinoid          | 0.046 | 0.187 | 0.137 | 0.206  | 0.129 | 0.198           | 0.211         | 0.196  |
| Carbonic             | 0.249 | 0.328 | 0.316 | 0.290  | 0.382 | 0.374           | 0.380         | 0.395  |
| Caspase              | 0.320 | 0.311 | 0.328 | -0.143 | 0.328 | 0.310           | 0.336         | 0.292  |
| Coagulation          | 0.080 | 0.063 | 0.086 | 0.063  | 0.042 | 0.088           | 0.095         | 0.105  |
| COX-1                | 0.268 | 0.257 | 0.290 | 0.085  | 0.262 | 0.300           | 0.304         | 0.298  |
| COX-2                | 0.184 | 0.218 | 0.232 | 0.081  | 0.219 | 0.240           | 0.241         | 0.237  |
| Dihydrofolate        | 0.224 | 0.057 | 0.217 | 0.123  | 0.212 | 0.210           | 0.225         | 0.172  |
| Dopamine             | 0.157 | 0.343 | 0.287 | 0.279  | 0.267 | 0.357           | 0.357         | 0.282  |
| Ephrin               | 0.191 | 0.236 | 0.260 | 0.160  | 0.208 | 0.278           | 0.275         | 0.281  |
| erbB1                | 0.188 | 0.232 | 0.246 | 0.014  | 0.196 | 0.228           | 0.234         | 0.232  |
| Estrogen             | 0.182 | 0.210 | 0.223 | 0.016  | 0.301 | 0.290           | 0.291         | 0.293  |
| Glucocorticoid       | 0.087 | 0.152 | 0.148 | 0.180  | 0.155 | 0.202           | 0.190         | 0.192  |
| Glycogen             | 0.128 | 0.142 | 0.150 | 0.126  | 0.135 | 0.198           | 0.188         | 0.169  |
| HERG                 | 0.175 | 0.216 | 0.217 | 0.137  | 0.213 | 0.250           | 0.247         | 0.254  |
| JAK2                 | 0.079 | 0.140 | 0.134 | 0.167  | 0.151 | 0.185           | 0.174         | 0.185  |
| LCK                  | 0.066 | 0.098 | 0.096 | 0.118  | 0.096 | 0.138           | 0.130         | 0.113  |
| Monoamine            | 0.221 | 0.234 | 0.255 | 0.117  | 0.264 | 0.284           | 0.287         | 0.269  |
| opioid               | 0.222 | 0.321 | 0.284 | 0.232  | 0.336 | 0.381           | 0.382         | 0.374  |
| Vanilloid            | 0.063 | 0.070 | 0.078 | 0.077  | 0.115 | 0.114           | 0.124         | 0.116  |
| Mean                 | 0.154 | 0.193 | 0.198 | 0.134  | 0.202 | 0.240           | 0.236         | 0.225  |

**Table S3. 5-fold CV SCCs of different models on each dataset in the OVOT setting**

| Targets              | MVE   | ENS    | BYS   | FDIST  | LDIST | Unweighted_Rank | Weighted_Rank | NLLCAL |
|----------------------|-------|--------|-------|--------|-------|-----------------|---------------|--------|
| A2a                  | 0.244 | 0.242  | 0.266 | 0.137  | 0.285 | 0.320           | 0.270         | 0.247  |
| ABL1                 | 0.039 | -0.029 | 0.031 | 0.212  | 0.083 | 0.103           | 0.130         | 0.126  |
| Acetylcholinesterase | 0.196 | 0.173  | 0.210 | 0.145  | 0.188 | 0.247           | 0.242         | 0.226  |
| Aurora-A             | 0.115 | 0.141  | 0.139 | 0.179  | 0.119 | 0.197           | 0.190         | 0.165  |
| B-raf                | 0.123 | 0.070  | 0.111 | 0.095  | 0.119 | 0.145           | 0.150         | 0.145  |
| Cannabinoid          | 0.083 | 0.079  | 0.117 | 0.178  | 0.144 | 0.172           | 0.164         | 0.178  |
| Carbonic             | 0.269 | 0.231  | 0.286 | 0.212  | 0.272 | 0.298           | 0.306         | 0.282  |
| Caspase              | 0.339 | 0.366  | 0.350 | -0.111 | 0.306 | 0.338           | 0.344         | 0.337  |
| Coagulation          | 0.115 | 0.079  | 0.118 | -0.029 | 0.048 | 0.068           | 0.097         | 0.094  |
| COX-1                | 0.174 | 0.085  | 0.183 | 0.047  | 0.140 | 0.171           | 0.182         | 0.177  |
| COX-2                | 0.203 | 0.148  | 0.211 | 0.031  | 0.180 | 0.196           | 0.215         | 0.201  |
| Dihydrofolate        | 0.210 | 0.035  | 0.164 | 0.077  | 0.100 | 0.121           | 0.197         | 0.190  |
| Dopamine             | 0.179 | 0.113  | 0.182 | 0.152  | 0.297 | 0.282           | 0.251         | 0.268  |
| Ephrin               | 0.210 | 0.204  | 0.233 | 0.106  | 0.244 | 0.258           | 0.255         | 0.234  |
| erbB1                | 0.255 | 0.175  | 0.260 | 0.052  | 0.220 | 0.259           | 0.274         | 0.282  |
| Estrogen             | 0.206 | 0.145  | 0.203 | 0.006  | 0.256 | 0.255           | 0.226         | 0.210  |
| Glucocorticoid       | 0.058 | 0.143  | 0.103 | 0.125  | 0.088 | 0.159           | 0.157         | 0.154  |
| Glycogen             | 0.122 | 0.133  | 0.167 | 0.100  | 0.144 | 0.192           | 0.187         | 0.177  |
| HERG                 | 0.210 | 0.192  | 0.219 | 0.102  | 0.195 | 0.244           | 0.238         | 0.184  |
| JAK2                 | 0.175 | 0.125  | 0.174 | 0.150  | 0.128 | 0.219           | 0.202         | 0.159  |
| LCK                  | 0.057 | -0.004 | 0.064 | 0.134  | 0.078 | 0.118           | 0.093         | 0.112  |
| Monoamine            | 0.201 | 0.196  | 0.228 | 0.110  | 0.212 | 0.260           | 0.236         | 0.209  |
| opioid               | 0.227 | 0.261  | 0.261 | 0.192  | 0.257 | 0.323           | 0.305         | 0.252  |
| Vanilloid            | 0.087 | 0.112  | 0.115 | 0.023  | 0.072 | 0.116           | 0.082         | 0.053  |
| Mean                 | 0.171 | 0.142  | 0.183 | 0.101  | 0.174 | 0.211           | 0.208         | 0.194  |

**Table S4. 5-fold CV ECEs of different models on each dataset in the IVIT setting.**

| Targets              | MVE   | ENS   | BYS   | NLLCAL |
|----------------------|-------|-------|-------|--------|
| A2a                  | 0.192 | 0.369 | 0.166 | 0.050  |
| ABL1                 | 0.115 | 0.316 | 0.087 | 0.023  |
| Acetylcholinesterase | 0.326 | 0.295 | 0.238 | 0.048  |
| Aurora-A             | 0.208 | 0.296 | 0.154 | 0.026  |
| B-raf                | 0.236 | 0.315 | 0.180 | 0.026  |
| Cannabinoid          | 0.173 | 0.281 | 0.128 | 0.037  |
| Carbonic             | 0.143 | 0.303 | 0.110 | 0.041  |
| Caspase              | 0.165 | 0.288 | 0.117 | 0.030  |
| Coagulation          | 0.212 | 0.303 | 0.161 | 0.026  |
| COX-1                | 0.147 | 0.317 | 0.114 | 0.036  |
| COX-2                | 0.182 | 0.298 | 0.137 | 0.032  |
| Dihydrofolate        | 0.190 | 0.315 | 0.152 | 0.032  |
| Dopamine             | 0.137 | 0.345 | 0.113 | 0.031  |
| Ephrin               | 0.213 | 0.313 | 0.165 | 0.015  |
| erbB1                | 0.188 | 0.272 | 0.132 | 0.036  |
| Estrogen             | 0.140 | 0.300 | 0.107 | 0.026  |
| Glucocorticoid       | 0.185 | 0.328 | 0.148 | 0.020  |
| Glycogen             | 0.278 | 0.313 | 0.216 | 0.026  |
| HERG                 | 0.300 | 0.302 | 0.225 | 0.029  |
| JAK2                 | 0.268 | 0.306 | 0.204 | 0.028  |
| LCK                  | 0.158 | 0.311 | 0.120 | 0.023  |
| Monoamine            | 0.232 | 0.320 | 0.178 | 0.027  |
| opioid               | 0.190 | 0.320 | 0.151 | 0.040  |
| Vanilloid            | 0.173 | 0.311 | 0.134 | 0.018  |
| Mean                 | 0.198 | 0.310 | 0.151 | 0.030  |

**Table S5. 5-fold CV ECEs of different models on each dataset in the IVOT setting**

| Targets              | MVE   | ENS   | BYS   | NLLCAL |
|----------------------|-------|-------|-------|--------|
| A2a                  | 0.278 | 0.389 | 0.251 | 0.115  |
| ABL1                 | 0.183 | 0.355 | 0.156 | 0.088  |
| Acetylcholinesterase | 0.396 | 0.349 | 0.314 | 0.037  |
| Aurora-A             | 0.245 | 0.345 | 0.207 | 0.049  |
| B-raf                | 0.378 | 0.374 | 0.324 | 0.113  |
| Cannabinoid          | 0.283 | 0.330 | 0.230 | 0.094  |
| Carbonic             | 0.235 | 0.313 | 0.186 | 0.045  |
| Caspase              | 0.302 | 0.331 | 0.242 | 0.074  |
| Coagulation          | 0.297 | 0.332 | 0.238 | 0.041  |
| COX-1                | 0.225 | 0.340 | 0.186 | 0.036  |
| COX-2                | 0.311 | 0.327 | 0.249 | 0.019  |
| Dihydrofolate        | 0.252 | 0.362 | 0.221 | 0.075  |
| Dopamine             | 0.293 | 0.375 | 0.262 | 0.076  |
| Ephrin               | 0.323 | 0.347 | 0.264 | 0.036  |
| erbB1                | 0.313 | 0.329 | 0.252 | 0.067  |
| Estrogen             | 0.248 | 0.332 | 0.203 | 0.035  |
| Glucocorticoid       | 0.348 | 0.362 | 0.293 | 0.066  |
| Glycogen             | 0.302 | 0.320 | 0.242 | 0.035  |
| HERG                 | 0.375 | 0.321 | 0.283 | 0.013  |
| JAK2                 | 0.355 | 0.331 | 0.285 | 0.068  |
| LCK                  | 0.225 | 0.344 | 0.190 | 0.069  |
| Monoamine            | 0.321 | 0.340 | 0.264 | 0.043  |
| opioid               | 0.259 | 0.351 | 0.220 | 0.056  |
| Vanilloid            | 0.339 | 0.344 | 0.277 | 0.035  |
| Mean                 | 0.295 | 0.344 | 0.243 | 0.058  |

**Table S6. 5-fold CV ECEs of different models on each dataset in the OVOT setting**

| Targets              | MVE   | ENS   | BYS   | NLLCAL |
|----------------------|-------|-------|-------|--------|
| A2a                  | 0.126 | 0.363 | 0.122 | 0.091  |
| ABL1                 | 0.095 | 0.325 | 0.081 | 0.078  |
| Acetylcholinesterase | 0.187 | 0.312 | 0.146 | 0.029  |
| Aurora-A             | 0.171 | 0.315 | 0.136 | 0.050  |
| B-raf                | 0.253 | 0.339 | 0.213 | 0.095  |
| Cannabinoid          | 0.114 | 0.334 | 0.088 | 0.068  |
| Carbonic             | 0.097 | 0.281 | 0.073 | 0.054  |
| Caspase              | 0.134 | 0.311 | 0.103 | 0.063  |
| Coagulation          | 0.151 | 0.354 | 0.126 | 0.054  |
| COX-1                | 0.096 | 0.349 | 0.079 | 0.043  |
| COX-2                | 0.137 | 0.340 | 0.111 | 0.033  |
| Dihydrofolate        | 0.185 | 0.379 | 0.162 | 0.078  |
| Dopamine             | 0.109 | 0.382 | 0.096 | 0.109  |
| Ephrin               | 0.166 | 0.311 | 0.128 | 0.033  |
| erbB1                | 0.156 | 0.334 | 0.124 | 0.028  |
| Estrogen             | 0.149 | 0.308 | 0.118 | 0.029  |
| Glucocorticoid       | 0.122 | 0.315 | 0.104 | 0.093  |
| Glycogen             | 0.173 | 0.332 | 0.135 | 0.034  |
| HERG                 | 0.161 | 0.310 | 0.124 | 0.042  |
| JAK2                 | 0.186 | 0.315 | 0.146 | 0.057  |
| LCK                  | 0.126 | 0.339 | 0.103 | 0.075  |
| Monoamine            | 0.190 | 0.338 | 0.154 | 0.059  |
| opioid               | 0.169 | 0.355 | 0.142 | 0.060  |
| Vanilloid            | 0.118 | 0.325 | 0.090 | 0.065  |
| Mean                 | 0.149 | 0.332 | 0.121 | 0.059  |

**Table S7. 5-fold CV ENCEs of different models on each dataset in the IVIT setting**

| Targets              | MVE   | ENS   | BYS   | NLLCAL |
|----------------------|-------|-------|-------|--------|
| A2a                  | 1.093 | 3.357 | 0.851 | 0.184  |
| ABL1                 | 0.668 | 2.927 | 0.478 | 0.165  |
| Acetylcholinesterase | 4.780 | 3.036 | 2.035 | 0.190  |
| Aurora-A             | 1.602 | 2.733 | 0.957 | 0.171  |
| B-raf                | 1.907 | 2.955 | 1.144 | 0.221  |
| Cannabinoid          | 1.387 | 2.570 | 0.862 | 0.205  |
| Carbonic             | 0.954 | 3.058 | 0.667 | 0.198  |
| Caspase              | 1.099 | 2.718 | 0.706 | 0.201  |
| Coagulation          | 1.575 | 2.810 | 0.987 | 0.175  |
| COX-1                | 0.991 | 3.199 | 0.723 | 0.227  |
| COX-2                | 1.288 | 2.781 | 0.852 | 0.178  |
| Dihydrofolate        | 1.721 | 3.487 | 1.118 | 0.256  |
| Dopamine             | 0.908 | 3.737 | 0.633 | 0.151  |
| Ephrin               | 1.334 | 2.526 | 0.823 | 0.148  |
| erbB1                | 1.409 | 2.319 | 0.817 | 0.177  |
| Estrogen             | 0.933 | 2.825 | 0.646 | 0.170  |
| Glucocorticoid       | 1.197 | 2.956 | 0.797 | 0.133  |
| Glycogen             | 2.960 | 2.962 | 1.500 | 0.189  |
| HERG                 | 2.843 | 2.776 | 1.538 | 0.175  |
| JAK2                 | 2.089 | 2.611 | 1.202 | 0.183  |
| LCK                  | 0.910 | 2.649 | 0.620 | 0.158  |
| Monoamine            | 1.775 | 2.854 | 1.092 | 0.199  |
| opioid               | 1.374 | 3.107 | 0.874 | 0.194  |
| Vanilloid            | 1.039 | 2.715 | 0.701 | 0.160  |
| Mean                 | 1.576 | 2.903 | 0.943 | 0.184  |



**Table S8. 5-fold CV ENCEs of different models on each dataset in the IVOT setting**

| Targets              | MVE   | ENS   | BYS   | NLLCAL |
|----------------------|-------|-------|-------|--------|
| A2a                  | 1.803 | 4.075 | 1.419 | 0.369  |
| ABL1                 | 1.394 | 3.814 | 0.913 | 0.387  |
| Acetylcholinesterase | 6.788 | 3.650 | 2.754 | 0.274  |
| Aurora-A             | 1.525 | 3.475 | 1.096 | 0.219  |
| B-raf                | 4.220 | 4.185 | 2.416 | 0.468  |
| Cannabinoid          | 2.463 | 3.193 | 1.566 | 0.404  |
| Carbonic             | 1.920 | 3.065 | 1.234 | 0.181  |
| Caspase              | 2.660 | 3.562 | 1.625 | 0.403  |
| Coagulation          | 2.733 | 3.289 | 1.569 | 0.230  |
| COX-1                | 1.429 | 3.434 | 1.034 | 0.242  |
| COX-2                | 2.906 | 3.323 | 1.735 | 0.176  |
| Dihydrofolate        | 1.851 | 4.295 | 1.321 | 0.302  |
| Dopamine             | 2.318 | 4.232 | 1.701 | 0.271  |
| Ephrin               | 2.926 | 3.318 | 1.679 | 0.199  |
| erbB1                | 2.700 | 3.071 | 1.598 | 0.324  |
| Estrogen             | 1.620 | 3.288 | 1.134 | 0.255  |
| Glucocorticoid       | 3.900 | 4.142 | 2.237 | 0.310  |
| Glycogen             | 2.776 | 3.133 | 1.639 | 0.226  |
| HERG                 | 6.126 | 3.554 | 2.639 | 0.284  |
| JAK2                 | 4.485 | 3.365 | 2.229 | 0.335  |
| LCK                  | 1.231 | 3.514 | 0.923 | 0.297  |
| Monoamine            | 3.429 | 3.917 | 2.116 | 0.327  |
| opioid               | 2.025 | 3.795 | 1.366 | 0.265  |
| Vanilloid            | 3.140 | 3.268 | 1.802 | 0.157  |
| Mean                 | 2.849 | 3.582 | 1.656 | 0.287  |

**Table S9. 5-fold CV ENCEs of different models on each dataset in the OVOT setting**

| Targets              | MVE   | ENS   | BYS   | NLLCAL |
|----------------------|-------|-------|-------|--------|
| A2a                  | 0.491 | 4.588 | 0.416 | 0.316  |
| ABL1                 | 0.395 | 3.528 | 0.324 | 0.278  |
| Acetylcholinesterase | 1.040 | 2.856 | 0.739 | 0.208  |
| Aurora-A             | 0.976 | 2.720 | 0.683 | 0.267  |
| B-raf                | 1.359 | 3.927 | 1.001 | 0.338  |
| Cannabinoid          | 0.434 | 3.067 | 0.300 | 0.263  |
| Carbonic             | 0.702 | 2.774 | 0.484 | 0.270  |
| Caspase              | 0.862 | 3.057 | 0.635 | 0.323  |
| Coagulation          | 0.706 | 4.683 | 0.560 | 0.287  |
| COX-1                | 0.456 | 3.653 | 0.371 | 0.198  |
| COX-2                | 0.749 | 3.857 | 0.543 | 0.196  |
| Dihydrofolate        | 0.964 | 6.431 | 0.721 | 0.340  |
| Dopamine             | 0.346 | 6.842 | 0.297 | 0.296  |
| Ephrin               | 0.822 | 2.569 | 0.575 | 0.177  |
| erbB1                | 0.696 | 3.003 | 0.533 | 0.190  |
| Estrogen             | 0.750 | 2.865 | 0.576 | 0.199  |
| Glucocorticoid       | 0.540 | 2.906 | 0.434 | 0.360  |
| Glycogen             | 0.903 | 2.911 | 0.608 | 0.159  |
| HERG                 | 1.068 | 3.163 | 0.800 | 0.265  |
| JAK2                 | 0.934 | 2.944 | 0.673 | 0.259  |
| LCK                  | 0.519 | 3.973 | 0.431 | 0.259  |
| Monoamine            | 1.372 | 3.205 | 0.908 | 0.274  |
| opioid               | 0.946 | 3.412 | 0.691 | 0.238  |
| Vanilloid            | 0.531 | 2.858 | 0.402 | 0.233  |
| Mean                 | 0.773 | 3.575 | 0.572 | 0.258  |

**Table S10. 5-fold CV validity values of NLLCAL and CP for prediction interval estimation on each target <sup>a</sup>**

| Targets              | IVIT   |       | IVOT         |              | OVOT         |              |
|----------------------|--------|-------|--------------|--------------|--------------|--------------|
|                      | NLLCAL | CP    | NLLCAL       | CP           | NLLCAL       | CP           |
| A2a                  | 0.879  | 0.904 | <u>0.804</u> | <u>0.794</u> | <u>0.799</u> | <u>0.820</u> |
| ABL1                 | 0.897  | 0.909 | <u>0.784</u> | <u>0.761</u> | 0.851        | 0.863        |
| Acetylcholinesterase | 0.905  | 0.898 | <u>0.845</u> | <u>0.777</u> | 0.890        | 0.894        |
| Aurora-A             | 0.901  | 0.901 | <u>0.845</u> | <u>0.772</u> | 0.858        | 0.860        |
| B-raf                | 0.902  | 0.902 | <u>0.772</u> | <u>0.597</u> | <u>0.817</u> | <u>0.824</u> |
| Cannabinoid          | 0.880  | 0.893 | <u>0.784</u> | <u>0.744</u> | 0.853        | 0.883        |
| Carbonic             | 0.875  | 0.902 | 0.866        | 0.851        | 0.859        | 0.905        |
| Caspase              | 0.898  | 0.895 | <u>0.813</u> | <u>0.779</u> | 0.864        | <u>0.843</u> |
| Coagulation          | 0.896  | 0.907 | <u>0.837</u> | <u>0.759</u> | <u>0.819</u> | <u>0.826</u> |
| COX-1                | 0.909  | 0.896 | 0.874        | 0.858        | 0.886        | 0.899        |
| COX-2                | 0.898  | 0.892 | 0.880        | <u>0.835</u> | 0.870        | 0.867        |
| Dihydrofolate        | 0.887  | 0.879 | <u>0.843</u> | <u>0.787</u> | <u>0.811</u> | <u>0.828</u> |
| Dopamine             | 0.866  | 0.901 | <u>0.804</u> | <u>0.782</u> | <u>0.823</u> | <u>0.818</u> |
| Ephrin               | 0.898  | 0.892 | 0.880        | <u>0.830</u> | 0.900        | 0.895        |
| erbB1                | 0.899  | 0.897 | <u>0.815</u> | <u>0.770</u> | 0.902        | 0.907        |
| Estrogen             | 0.908  | 0.898 | 0.858        | <u>0.802</u> | 0.885        | 0.888        |
| Glucocorticoid       | 0.893  | 0.892 | <u>0.808</u> | <u>0.714</u> | <u>0.845</u> | 0.859        |
| Glycogen             | 0.896  | 0.881 | <u>0.847</u> | <u>0.834</u> | 0.878        | 0.881        |
| HERG                 | 0.903  | 0.898 | 0.889        | <u>0.834</u> | 0.911        | 0.896        |
| JAK2                 | 0.906  | 0.895 | <u>0.798</u> | <u>0.727</u> | 0.876        | 0.884        |
| LCK                  | 0.886  | 0.895 | <u>0.800</u> | <u>0.750</u> | <u>0.814</u> | <u>0.846</u> |
| Monoamine            | 0.898  | 0.898 | <u>0.839</u> | <u>0.808</u> | 0.883        | 0.895        |
| opioid               | 0.881  | 0.897 | <u>0.828</u> | <u>0.789</u> | 0.877        | 0.877        |
| Vanilloid            | 0.889  | 0.890 | 0.884        | <u>0.812</u> | 0.885        | 0.871        |
| Mean                 | 0.894  | 0.896 | 0.833        | 0.782        | 0.861        | 0.868        |

<sup>a</sup> Values falling outside [0.85, 0.95] are underlined.

**Table S11. 5-fold CV efficiency values of NLLCAL and CP for prediction interval estimation on each target**

| Targets              | IVIT   |       | IVOT   |       | OVOT   |       |
|----------------------|--------|-------|--------|-------|--------|-------|
|                      | NLLCAL | CP    | NLLCAL | CP    | NLLCAL | CP    |
| A2a                  | 2.282  | 2.532 | 2.894  | 2.751 | 3.006  | 3.257 |
| ABL1                 | 2.605  | 2.705 | 2.568  | 2.460 | 3.366  | 3.542 |
| Acetylcholinesterase | 2.142  | 2.125 | 2.665  | 2.208 | 3.069  | 3.110 |
| Aurora-A             | 2.300  | 2.371 | 2.931  | 2.522 | 2.943  | 3.065 |
| B-raf                | 1.801  | 1.834 | 2.747  | 1.924 | 3.392  | 3.431 |
| Cannabinoid          | 2.166  | 2.238 | 2.658  | 2.401 | 3.161  | 3.392 |
| Carbonic             | 1.717  | 1.899 | 1.895  | 1.785 | 2.067  | 2.361 |
| Caspase              | 1.767  | 1.823 | 2.014  | 1.829 | 2.507  | 2.484 |
| Coagulation          | 2.532  | 2.620 | 3.084  | 2.557 | 3.405  | 3.512 |
| COX-1                | 2.060  | 2.084 | 2.256  | 2.157 | 2.365  | 2.501 |
| COX-2                | 2.297  | 2.319 | 2.889  | 2.536 | 3.011  | 2.995 |
| Dihydrofolate        | 2.502  | 2.526 | 3.273  | 2.899 | 3.394  | 3.331 |
| Dopamine             | 2.441  | 2.678 | 3.015  | 2.748 | 2.935  | 3.052 |
| Ephrin               | 2.000  | 1.988 | 2.451  | 2.134 | 2.591  | 2.519 |
| erbB1                | 2.168  | 2.166 | 2.447  | 2.206 | 3.222  | 3.372 |
| Estrogen             | 2.000  | 2.015 | 2.250  | 1.917 | 2.511  | 2.628 |
| Glucocorticoid       | 1.851  | 1.835 | 2.385  | 1.937 | 2.711  | 2.792 |
| Glycogen             | 2.325  | 2.310 | 2.662  | 2.539 | 3.166  | 3.211 |
| HERG                 | 1.729  | 1.697 | 2.006  | 1.722 | 2.319  | 2.165 |
| JAK2                 | 1.965  | 1.938 | 2.466  | 2.075 | 3.154  | 3.244 |
| LCK                  | 2.509  | 2.672 | 3.123  | 2.634 | 3.410  | 3.689 |
| Monoamine            | 1.984  | 2.004 | 2.169  | 1.980 | 2.720  | 2.828 |
| opioid               | 2.120  | 2.221 | 2.539  | 2.299 | 3.096  | 3.070 |
| Vanilloid            | 2.268  | 2.318 | 2.837  | 2.328 | 2.742  | 2.735 |
| Mean                 | 2.147  | 2.205 | 2.593  | 2.273 | 2.928  | 3.012 |

**Table S12. 5-fold CV RMSEs of D-MPNN models trained with different loss functions on each target**

| Targets              | IVIT  |       | IVOT  |       | OVOT  |       |
|----------------------|-------|-------|-------|-------|-------|-------|
|                      | MVE   | MSE   | MVE   | MSE   | MVE   | MSE   |
| A2a                  | 0.790 | 0.823 | 1.118 | 1.182 | 1.162 | 1.210 |
| ABL1                 | 0.849 | 0.871 | 1.073 | 1.090 | 1.142 | 1.180 |
| Acetylcholinesterase | 0.693 | 0.708 | 0.974 | 0.993 | 0.976 | 1.000 |
| Aurora-A             | 0.761 | 0.773 | 1.044 | 1.050 | 1.023 | 1.029 |
| B-raf                | 0.599 | 0.612 | 1.148 | 1.206 | 1.212 | 1.287 |
| Cannabinoid          | 0.747 | 0.764 | 1.103 | 1.083 | 1.108 | 1.114 |
| Carbonic             | 0.603 | 0.610 | 0.680 | 0.699 | 0.733 | 0.770 |
| Caspase              | 0.611 | 0.620 | 0.811 | 0.820 | 0.902 | 0.943 |
| Coagulation          | 0.827 | 0.840 | 1.107 | 1.121 | 1.227 | 1.221 |
| COX-1                | 0.673 | 0.679 | 0.774 | 0.775 | 0.780 | 0.776 |
| COX-2                | 0.755 | 0.764 | 0.961 | 0.965 | 1.030 | 1.050 |
| Dihydrofolate        | 0.846 | 0.860 | 1.138 | 1.106 | 1.206 | 1.195 |
| Dopamine             | 0.840 | 0.852 | 1.129 | 1.146 | 1.044 | 1.052 |
| Ephrin               | 0.653 | 0.654 | 0.805 | 0.804 | 0.809 | 0.810 |
| erbB1                | 0.690 | 0.696 | 0.985 | 0.988 | 1.006 | 1.002 |
| Estrogen             | 0.653 | 0.662 | 0.812 | 0.814 | 0.829 | 0.855 |
| Glucocorticoid       | 0.600 | 0.608 | 0.930 | 0.944 | 0.892 | 0.904 |
| Glycogen             | 0.752 | 0.761 | 0.928 | 0.962 | 1.009 | 1.030 |
| HERG                 | 0.561 | 0.562 | 0.738 | 0.739 | 0.762 | 0.765 |
| JAK2                 | 0.633 | 0.641 | 1.008 | 1.051 | 1.009 | 0.998 |
| LCK                  | 0.823 | 0.833 | 1.179 | 1.179 | 1.228 | 1.254 |
| Monoamine            | 0.659 | 0.672 | 0.836 | 0.841 | 0.875 | 0.883 |
| opioid               | 0.719 | 0.739 | 1.009 | 1.027 | 1.005 | 0.996 |
| Vanilloid            | 0.726 | 0.725 | 0.889 | 0.889 | 0.862 | 0.868 |
| Mean                 | 0.711 | 0.722 | 0.966 | 0.978 | 0.993 | 1.008 |

**Table S13. 5-fold CV RMSEs of RF models on each target**

| Targets              | IVIT  | IVOT  | OVOT  |
|----------------------|-------|-------|-------|
| A2a                  | 0.763 | 0.962 | 0.995 |
| ABL1                 | 0.817 | 1.032 | 1.111 |
| Acetylcholinesterase | 0.779 | 1.035 | 1.037 |
| Aurora-A             | 0.790 | 0.994 | 1.004 |
| B-raf                | 0.630 | 1.035 | 1.243 |
| Cannabinoid          | 0.750 | 1.045 | 1.104 |
| Carbonic             | 0.608 | 0.785 | 0.795 |
| Caspase              | 0.599 | 0.871 | 0.895 |
| Coagulation          | 0.841 | 1.114 | 1.158 |
| COX-1                | 0.701 | 0.814 | 0.810 |
| COX-2                | 0.792 | 1.067 | 1.051 |
| Dihydrofolate        | 0.854 | 1.048 | 1.102 |
| Dopamine             | 0.756 | 0.950 | 1.101 |
| Ephrin               | 0.678 | 0.825 | 0.848 |
| erbB1                | 0.722 | 1.015 | 1.031 |
| Estrogen             | 0.692 | 0.920 | 0.914 |
| Glucocorticoid       | 0.596 | 0.950 | 0.924 |
| Glycogen             | 0.733 | 0.945 | 0.955 |
| HERG                 | 0.622 | 0.790 | 0.809 |
| JAK2                 | 0.657 | 0.956 | 0.939 |
| LCK                  | 0.820 | 1.111 | 1.141 |
| Monoamine            | 0.700 | 0.882 | 0.917 |
| opioid               | 0.761 | 1.036 | 0.998 |
| Vanilloid            | 0.736 | 0.890 | 0.882 |
| Mean                 | 0.725 | 0.961 | 0.990 |

**Table S14. Average performance of ENS, FDIST, Weighted\_Rank and NLLCAL for RF models <sup>a</sup>**

| Metrics | Splitting Strategies | ENS          | FDIST           | Weighted_Rank | NLLCAL       |
|---------|----------------------|--------------|-----------------|---------------|--------------|
| SCC     | IVIT                 | 0.325        | 0.191           | 0.325         | <b>0.329</b> |
|         | IVOT                 | 0.248        | 0.127           | <b>0.254</b>  | <b>0.254</b> |
|         | OVOT                 | 0.229        | 0.124           | 0.231         | <b>0.237</b> |
| ECE     | IVIT                 | <b>0.025</b> | NA <sup>b</sup> | NA            | 0.033        |
|         | IVOT                 | 0.050        | NA              | NA            | <b>0.048</b> |
|         | OVOT                 | <b>0.058</b> | NA              | NA            | <b>0.058</b> |
| ENCE    | IVIT                 | 0.211        | NA              | NA            | <b>0.179</b> |
|         | IVOT                 | 0.248        | NA              | NA            | <b>0.226</b> |
|         | OVOT                 | 0.285        | NA              | NA            | <b>0.231</b> |

<sup>a</sup> Best results are highlighted in boldface type.

<sup>b</sup> Not Applicable.

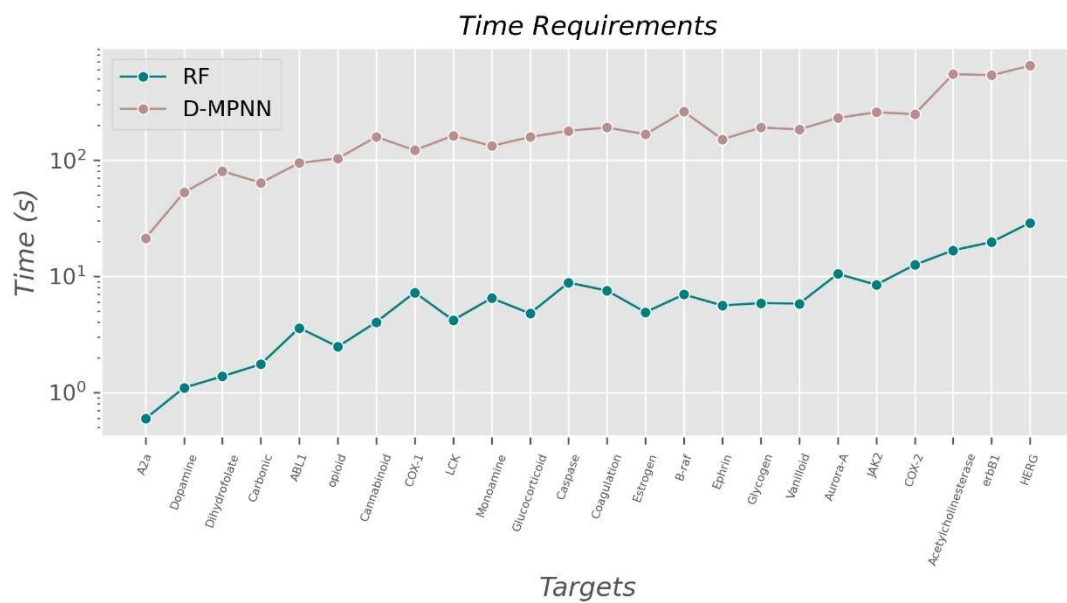

**Figure S1.** Summary of the average training time for RF models and D-MPNN models on each target in the IVIT setting. D-MPNN models were trained with one NVIDIA Tesla GPU with 16GB of memory.
